# Supplementary material
Source: publisher site journal article supplement (https://www.dovepress.com/article/502971)
Supplement: Supplementary file 1 [file get_supplementary_file.php]

**SUPPLEMENTARY MATERIAL**

**TITLE:**

**Recommendations for improving discharge-related care following a COPD exacerbation: an expert panel consensus with emphasis on low‑ and middle‑income countries**

**AUTHORS:**

1Adrian Rendon*, 2Susana Luhning, 3Philip Bardin, 4Carlos Andrés Celis-Preciado, 5Moustafa El Shazly, 6Mark Cohen-Todd, 7Ahmad Izuanuddin Ismail, 8Majdy Idrees, 9Seong Yong Lim, 10Pin-Kuei Fu,11Terence Seemungal, 12Nurdan Köktürk,13John R Hurst

**AFFILIATIONS:**

1Universidad Autónoma de Nuevo León, Hospital Universitario ”Dr. José Eleuterio González,” Centro de Investigación, Prevención y Tratamiento de Infecciones Respiratorias (CIPTIR), Monterrey, México

2Pneumologist, Hospital Nacional de Clínicas, Universidad Nacional de Córdoba. Córdoba, Argentina

3Australia Monash Lung, Sleep, Allergy and Immunology, Melbourne, Victoria, Australia

4Pulmonary Unit, Internal Medicine Department, Hospital Universitario San Ignacio, Bogota, Colombia.

5Chest Department, Kasr el-Aini hospital, Faculty of Medicine, Cairo University, Egypt

6Hospital Centro Médico, Guatemala City, Guatemala

7Cardiac, Vascular and Lung Research Institute (CaVaLRI), Universiti Teknologi MARA, Selangor, Malaysia

8Department of Medicine, Division of Pulmonary Medicine, Prince Sultan Military Medical City. Riyadh, Saudi Arabi

9Division of Pulmonary and Critical Care Medicine, Department of Medicine, Kangbuk Samsung Hospital, Sungkyunkwan University School of Medicine, Seoul, Republic of Korea

10Department of Medical Research, Taichung Veterans General Hospital, Taichung, Taiwan

11Department of Clinical Medical Sciences, Faculty of Medical Sciences, the University of the West Indies (St Augustine Campus), Trinidad and Tobago

12Department of Pulmonary and Critical Care Medicine, School of Medicine, Gazi University Ankara, Turkey

13UCL Respiratory, University College London, Royal Free Campus, London NW3 2QG, UK

***Corresponding author: Adrian Rendon**

Affiliation:Universidad Autónoma de Nuevo León, Hospital Universitario ”Dr. José Eleuterio González,” Centro de Investigación, Prevención y Tratamiento de Infecciones Respiratorias (CIPTIR), Monterrey, México

Email: [adrianrendon@hotmail.com](mailto:adrianrendon@hotmail.com)

**Supplementary Table 1. Questions posed to the expert panel before (A) and during (B) the meeting**

| **(A) Premeeting questions included in the online survey** |
| --- |
| What do you believe to be the biggest challenge(s) faced by patients with COPD following discharge from hospital after an exacerbation? |
| In your country, what do you believe are the current key gaps in discharge management plans for patients with COPD, after being hospitalized for an exacerbation? |
| In your country, is there a local or national protocol/guideline for discharging patients with COPD following an exacerbation? |
| How well is this local or national protocol/guideline implemented in clinical practice? |
| Do you feel that this local or national protocol/guideline delays or prevents patients from experiencing future exacerbations? |
| Do you feel that a local or national discharge protocol/guideline is needed? |
| Do you refer to any global/regional protocols when discharging patients with COPD following an exacerbation? |
| Which global/regional protocols do you refer to? |
| Are there any challenges/opportunities for implementing discharge protocols in clinical practice? |
| Do you feel that patients are discharged from hospital with appropriate maintenance therapy following an exacerbation? Please explain your answer. |
| In your opinion, what would be the key recommendations when discharging patients with COPD following an exacerbation? (e.g., optimization of pharmacotherapy, managing comorbidities, and follow-up) |
| **(B) Questions discussed during the meeting** |
| In emerging markets, what should a discharge protocol look like and what should the different sections and key recommendations be? |
| What recommendation should be included in treatment plans (pharmacological, non-pharmacological, or pulmonary rehabilitation)? |
| What recommendation should be included for patient follow-up? (e.g., local considerations) |
| What recommendation should be included for patient/caregiver education? |
| How can we encourage effective protocol implementation across countries? |

COPD, chronic obstructive pulmonary disease.

**Supplementary Table 2. Protocol for discharge of patients with COPD following an exacerbation, implemented as a care bundle, with a particular focus on LMICs**

| **OBJECTIVE:** **Ensure prompt diagnosis, identify the risk of readmission and optimize the maintenance treatment plan** | |
| --- | --- |
| **STEP 1** | **Confirm COPD diagnosis and identify both comorbidities and patients at high risk of readmission 1**   - Conduct assessments to distinguish COPD exacerbations from other potentially life-threatening conditions - Perform predischarge spirometry, if available, to eliminate diagnostic uncertainty and identify patients admitted with suspected COPD exacerbation who have no prior spirometric documentation2,3 - Identify factors associated with poor outcomes, such as older age, lower BMI, comorbidities, previous hospitalization for COPD exacerbations, severe exacerbations, and the need for long-term oxygen therapy at discharge1,4-7 - Patients with cardiovascular comorbidities,5 a high prevalence and severity of respiratory symptoms, poor lung function and QoL, reduced exercise capacity, low lung density, and thickened bronchial walls on CT scan are also at an increased risk of mortality following an acute COPD exacerbation1 - Consider risk factors associated with an increased risk of hospital/ED readmission: history of previous exacerbations,8 frequent productive cough;9 severity of dyspnea (Medical Research Council grade >3);10 older age, length of hospital stay, male sex, insurance type, type of hospital,11,12 comorbidities13 including depression and anxiety,14 and suboptimal peak inspiratory flow rate15 |
| **STEP 2** | **Optimize the pharmacological treatment plan to ensure that patients receive combination of long‑acting bronchodilator maintenance therapy, with or without ICS**   - Ensure patients receive LABA+LAMA if they have a high symptom burden (mMRC ≥2, CAT ≥10), ≥2 moderate exacerbation or ≥1 leading to hospitalization, or if they have not already been prescribed maintenance therapy; LABA+LAMA+ICS should be prescribed if patients have BECs ≥300 cells/μL or if they experience further exacerbations on LABA+LAMA and have BECs ≥100 cells/μL1 |
| **OBJECTIVE:** **Ensure consistent delivery of holistic care following discharge from hospital/ED** | |
| **STEP 3** | **Provide non-pharmacological treatment1**   - Prescribe pneumococcal and influenza vaccinations16 and prepare a smoking cessation and pulmonary rehabilitation plan17, if available - Develop a comprehensive plan for managing comorbidities, including psychological disorders |
| **STEP 4** | **Ensure recovery to clinical stability1**   - Perform a full review of clinical and laboratory data to ensure patients return to a stable clinical state following discharge - Assess the need for continuing oxygen therapy - Perform pulse oximetry to diagnose hypoxemia, evaluate the need for supplemental oxygen therapy, or check for signs of respiratory failure1,18 - Ensure all clinical or investigational abnormalities have been identified |
| **STEP 5** | **Schedule follow-up appointments and ensure appropriate patient referral to a specialist HCP**   - If appropriate, refer patients to a specialist HCP1 for individualization of the treatment plan - To prioritize delivery of healthcare services, consider use of telehealth services, and different schedules for follow-up visits - Schedule early follow-up (1–4 weeks) for patients at high risk of hospital readmission:1 - Evaluate the patient’s ability to cope with their usual environment - Review treatment regimens and patient’s understanding of their treatment plan - Reassess the inhaler technique and the need for long-term oxygen - Document symptom burden, comorbidities, and patient's capacity for physical activity - Schedule later follow-up (12–16 weeks) for all other patients to:1 - Assess the above parameters, including adherence to prescribed treatment and smoking status/smoke exposure |
| **STEP 6** | **Provide a discharge action plan and develop patient/caregiver education plans, including correct inhaler use1,19,20**   - Discuss and provide a tailored action plan to patients at the time of discharge for effective self-management21 - Ensure that the importance of the action plan is clearly communicated and includes contact information in the event of an exacerbation and is personalized with respect to avoidance of aggravating factors and monitoring/management of worsening symptoms - Review and update the action plan during follow-up visits, as required - Provide education on reducing respiratory-related hospital admissions, improving QoL, and preventing future events - Provide counseling on when to seek healthcare advice - Include information on inhaled medications, including the difference between maintenance and reliever medications, inhaler devices, inhalation techniques, and the importance of adherence to prescribed regimen and regular follow-up visits |
| **OBJECTIVE: Ensure delivery of care by a specialist HCP through personalization of the treatment plan** | |
| **STEP 7** | **Individualize the treatment plan1**   - Perform a detailed assessment of biomarkers to understand the pathogenic processes and pharmacological responses to therapeutic interventions,1 Patients on LAMA+LABA who experience further exacerbations and have BEC ≥100 cells/μL, and those with BEC >300 cells/μL are at a higher risk of exacerbations and more likely to benefit from preventive treatment with triple therapy LABA+LAMA+ICS.1,22 - To address the heterogeneity and complexity of COPD in clinical practice, use the approach of treatable traits associated with increased exacerbation risk,1 which may be pulmonary (e.g., airflow limitation, eosinophilic airway inflammation), extrapulmonary (e.g., obstructive sleep apnea), or behavioral (e.g., poor inhaler technique)23 - Perform a detailed lung function assessment at follow-up1 |

BEC, blood eosinophil count; BMI, body mass index; CAT, COPD Assessment Test; COPD, chronic obstructive pulmonary disease; CT, computed tomography; ED, emergency department; HCP, healthcare practitioner; ICS, inhaled corticosteroid; LABA, long-acting β2-agonist; LAMA, long‑acting muscarinic antagonist; LMIC, low- and middle-income country; mMRC, modified Medical Research Council; QoL, quality of life.

**REFERENCES**

1. Global Initiative for Chronic Obstructive Lung Disease. Global Strategy for Prevention, Diagnosis and Management of COPD. 2024 Available from: <https://goldcopd.org>. Accessed 14 January 2024.

2. Fernández-Villar A, Represas-Represas C, Mouronte-Roibás C, et al. Reliability and usefulness of spirometry performed during admission for COPD exacerbation. *PLoS One.* 2018;13(3):e0194983.

3. Loh CH, Genese FA, Kannan KK, Lovings TM, Peters SP, Ohar JA. Spirometry in hospitalized patients with acute exacerbation of COPD accurately predicts post discharge airflow obstruction. *Chronic Obstr Pulm Dis.* 2018;5(2):124-133.

4. Guo Y, Zhang T, Wang Z, et al. Body mass index and mortality in chronic obstructive pulmonary disease: A dose-response meta-analysis. *Medicine (Baltimore).* 2016;95(28):e4225.

5. Piquet J, Chavaillon JM, David P, et al. High-risk patients following hospitalisation for an acute exacerbation of COPD. *Eur Respir J.* 2013;42(4):946-955.

6. Singanayagam A, Schembri S, Chalmers JD. Predictors of mortality in hospitalized adults with acute exacerbation of chronic obstructive pulmonary disease. *Ann Am Thorac Soc.* 2013;10(2):81-89.

7. Garcia-Aymerich J, Serra Pons I, Mannino DM, Maas AK, Miller DP, Davis KJ. Lung function impairment, COPD hospitalisations and subsequent mortality. *Thorax.* 2011;66(7):585-590.

8. Connolly MJ, Lowe D, Anstey K, et al. Admissions to hospital with exacerbations of chronic obstructive pulmonary disease: Effect of age related factors and service organisation. *Thorax.* 2006;61(10):843-848.

9. Njoku CM, Alqahtani JS, Wimmer BC, et al. Risk factors and associated outcomes of hospital readmission in COPD: a systematic review. *Respir Med.* 2020;173:105988.

10. Gaude GS, Rajesh BP, Chaudhury A, Hattiholi J. Outcomes associated with acute exacerbations of chronic obstructive pulmonary disorder requiring hospitalization. *Lung India.* 2015;32(5):465-472.

11. Jiang X, Xiao H, Segal R, Mobley WC, Park H. Trends in readmission rates, hospital charges, and mortality for patients with chronic obstructive pulmonary disease (COPD) in Florida from 2009 to 2014. *Clin Ther.* 2018;40(4):613-626.e611.

12. Kim TW, Choi ES, Kim WJ, Jo HS. The association with COPD readmission rate and access to medical institutions in elderly patients. *Int J Chron Obstruct Pulmon Dis.* 2021;16:1599-1606.

13. Sharif R, Parekh TM, Pierson KS, Kuo YF, Sharma G. Predictors of early readmission among patients 40 to 64 years of age hospitalized for chronic obstructive pulmonary disease. *Ann Am Thorac Soc.* 2014;11(5):685-694.

14. Singh G, Zhang W, Kuo YF, Sharma G. Association of psychological disorders with 30-day readmission rates in patients with COPD. *Chest.* 2016;149(4):905-915.

15. Loh CH, Peters SP, Lovings TM, Ohar JA. Suboptimal inspiratory flow rates are associated with chronic obstructive pulmonary disease and all-cause readmissions. *Ann Am Thorac Soc.* 2017;14(8):1305-1311.

16. Li Y, Zhang P, An Z, et al. Effectiveness of influenza and pneumococcal vaccines on chronic obstructive pulmonary disease exacerbations. *Respirology.* 2022;27(10):844-853.

17. Reis AJ, Alves C, Furtado S, et al. COPD exacerbations: management and hospital discharge. *Pulmonology.* 2018;24(6):345-350.

18. Lacasse Y, Thériault S, St-Pierre B, et al. Oximetry neither to prescribe long-term oxygen therapy nor to screen for severe hypoxaemia. *ERJ Open Res.* 2021;7(4).

19. American Society of Health-System Pharmacists (ASHP). Ensuring safe transitions of care in patients with chronic obstructive pulmonary disease - patient education and counseling. Available from: <https://www.copdcare.org/patient-education-counseling.php>. Accessed 14 November 2023.

20. COPD Foundation. My COPD action plan. Available from: <https://www.copdfoundation.org/Praxis/Resource-Repository/Search/Article/404/My-COPD-Action-Plan.aspx#:~:text=My%20COPD%20Action%20Plan%20%7C%20COPD%20PRAXIS&text=The%20COPD%20Foundation%20is%20a,and%20advocating%20for%20all%20affected>. Accessed 14 November 2023.

21. Hegelund A, Andersen IC, Andersen MN, Bodtger U. The impact of a personalised action plan delivered at discharge to patients with COPD on readmissions: a pilot study. *Scand J Caring Sci.* 2020;34(4):909-918.

22. Stockley RA, Halpin DMG, Celli BR, Singh D. Chronic obstructive pulmonary disease biomarkers and their interpretation. *Am J Respir Crit Care Med.* 2019;199(10):1195-1204.

23. Cardoso J, Ferreira AJ, Guimarães M, Oliveira AS, Simão P, Sucena M. Treatable traits in COPD - a proposed approach. *Int J Chron Obstruct Pulmon Dis.* 2021;16:3167-3182.
